# Supplementary material for: Template-free synthesis of mesoporous X–Mn (X = Co, Ni, Zn) bimetal oxides and catalytic application in the room temperature removal of low-concentration NO
Source: Royal Society of Chemistry journal article supplement (doi:10.1039/c3ta10971b), 2013-01-01

## Supporting Information

### **Template-free synthesis of mesoporous X-Mn (X = Co, Ni, Zn) bimetal oxides and catalytic application in room-temperature removal of low-concentration NO**

Zhu Shu<sup>a</sup>, Weimin Huang<sup>a</sup>, Zile Hua<sup>a</sup>, Lingxia Zhang<sup>a</sup>, Xiangzhi Cui<sup>a</sup>, Yu Chen<sup>a</sup>, Hangrong Chen<sup>a</sup>,  
Chenyang Wei<sup>a</sup>, Yongxia Wang<sup>a</sup>, Xiangqian Fan<sup>a</sup>, Heliang Yao<sup>a</sup>, Dannong He<sup>b</sup>, Jianlin Shi<sup>a,\*</sup>

<sup>a</sup>State Key Laboratory of High Performance Ceramics and Superfine Microstructure, Shanghai Institute of Ceramics, Chinese Academy of Sciences, 1295 Dingxi Road, Shanghai 200050, P. R. China

<sup>b</sup>National Engineering Research Center for Nanotechnology, 28 East Jiangchuan Road, Shanghai 200241, P. R. China

\*Corresponding author: Jianlin Shi (E-mail: [jlshi@sunm.shenc.ac.cn](mailto:jlshi@sunm.shenc.ac.cn), Tel.: +86-21-52412712, Fax: +86-21-52413122, Postal address: 1295 Dingxi Road, Shanghai 200050, P. R. China)

**Fig. S1.** XRD patterns of the precursors with single metal element (Mn (or Co, Ni, Zn)-oxalate) or two metal elements ( $(\text{Co (or Ni, Zn)}_x\text{Mn}_y\text{-oxalate})$ ).

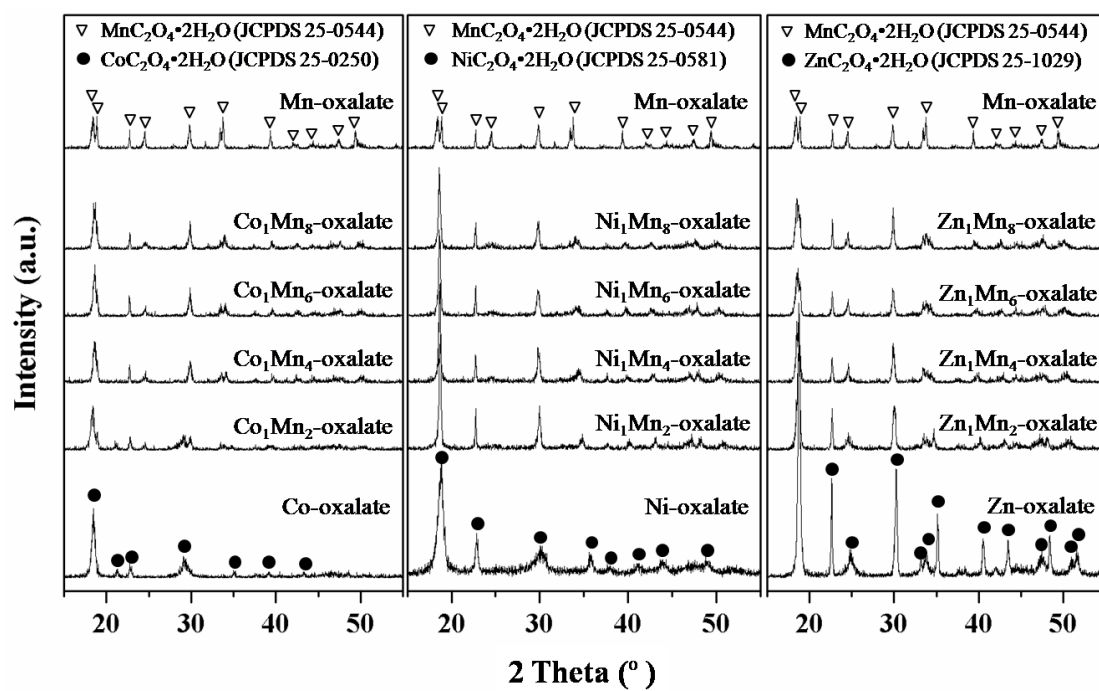

**Fig. S2.** TG curves of three representative bimetal precursors ( $\text{Co}_1\text{Mn}_6$ -oxalate,  $\text{Ni}_1\text{Mn}_8$ -oxalate and  $\text{Zn}_1\text{Mn}_6$ -oxalate) and four single-metal precursors (Mn (or Co, Ni, Zn)-oxalate).

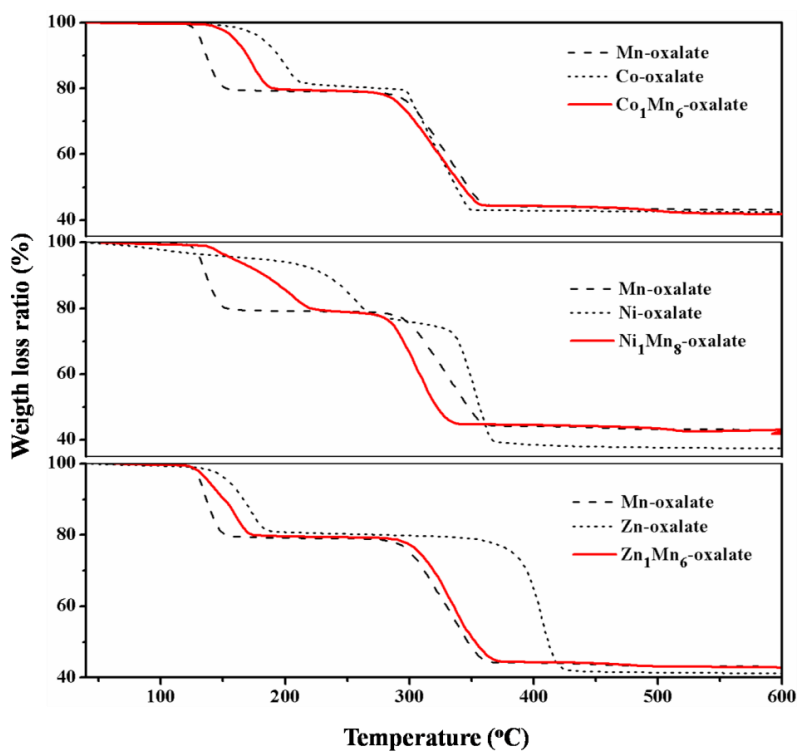

**Fig. S3.** XRD patterns of the 300 °C calcined samples with single metal element (Mn (or Co, Ni, Zn)-300) or two metal elements (Co (or Ni, Zn)<sub>x</sub>Mn<sub>y</sub>-300).

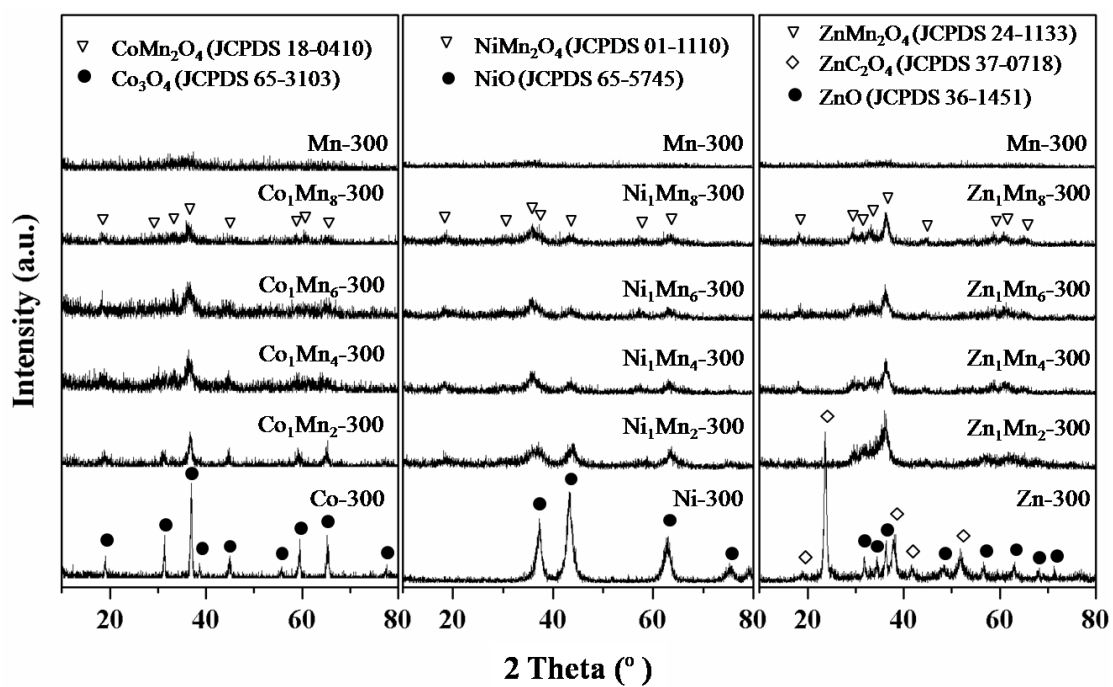

**Fig. S4.** Low-angle XRD patterns of  $\text{Co}_1\text{Mn}_6\text{-300}$ ,  $\text{Ni}_1\text{Mn}_8\text{-300}$  and  $\text{Zn}_1\text{Mn}_6\text{-300}$ .

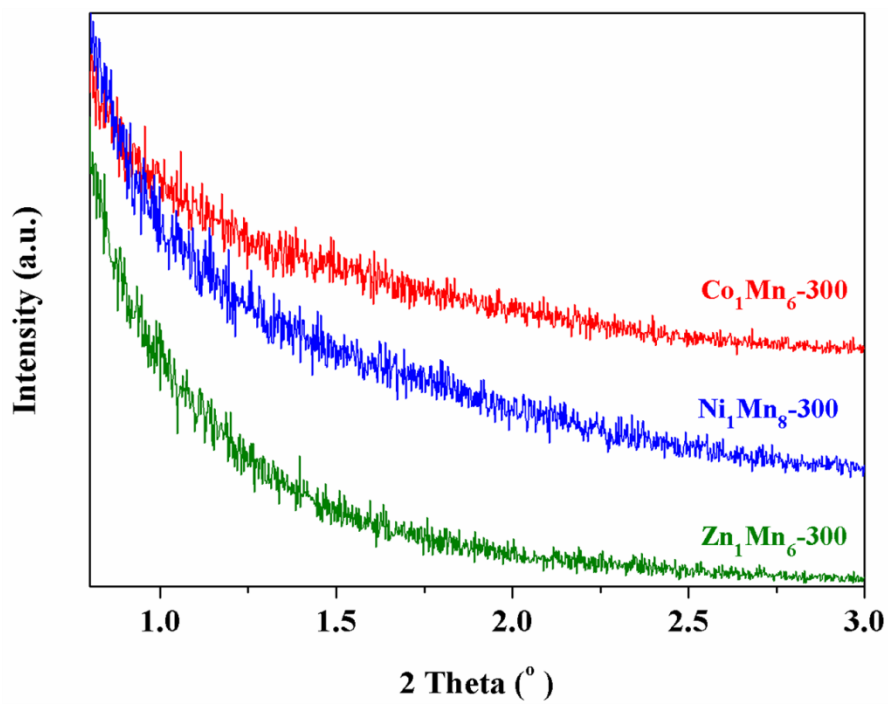

**Fig. S5.** H<sub>2</sub>-TPR curves of Mn-300, Co<sub>1</sub>Mn<sub>6</sub>-300, Ni<sub>1</sub>Mn<sub>8</sub>-300 and Zn<sub>1</sub>Mn<sub>6</sub>-300.

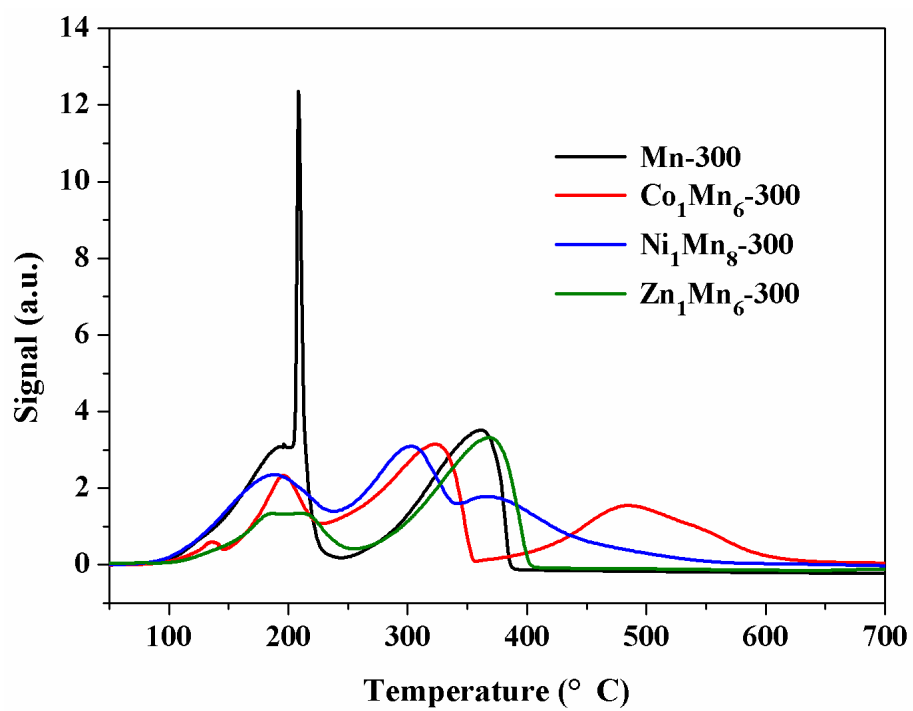

**Fig. S6.** Time courses of NO removal on  $\text{Co}_1\text{Mn}_6\text{-300}$ ,  $\text{Co}_1\text{Mn}_6\text{-400}$ ,  $\text{Ni}_1\text{Mn}_8\text{-300}$ ,  $\text{Ni}_1\text{Mn}_8\text{-400}$ ,  $\text{Zn}_1\text{Mn}_6\text{-300}$  and  $\text{Zn}_1\text{Mn}_6\text{-400}$ . Reaction conditions:  $[\text{NO}] = 10 \text{ ppm}$ ,  $[\text{O}_2] = 21 \%$ , balance =  $\text{N}_2$ , temperature =  $25 \text{ }^\circ\text{C}$  and  $\text{GHSV} = 120,000 \text{ mL}\cdot\text{g}^{-1}\cdot\text{h}^{-1}$ .

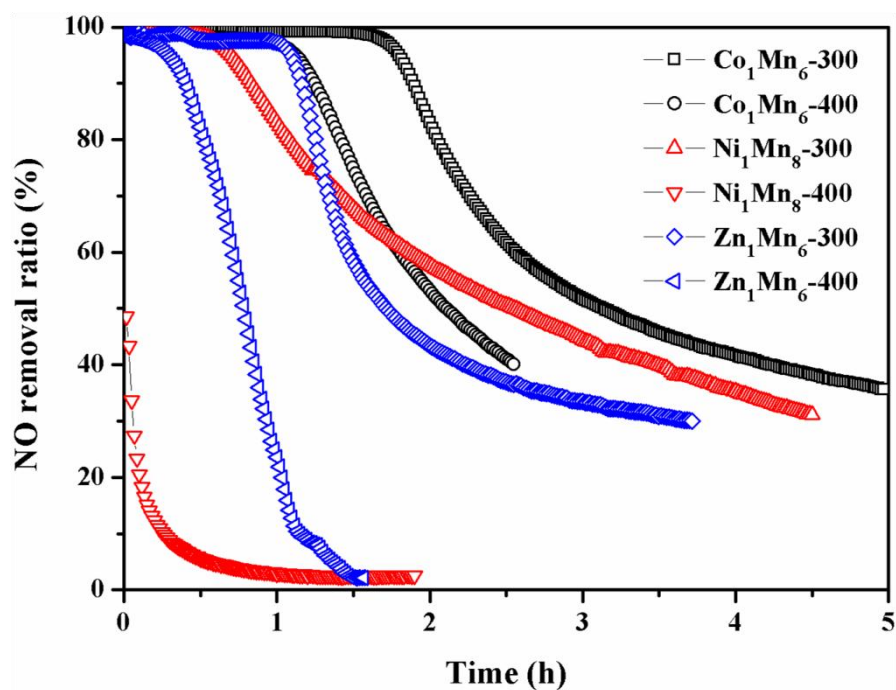

**Fig. S7.** Time courses of outlet concentrations of NO and NO<sub>2</sub> in the NO adsorption tests in the O<sub>2</sub>-free condition on Co<sub>1</sub>Mn<sub>6</sub>-300, Ni<sub>1</sub>Mn<sub>8</sub>-300 and Zn<sub>1</sub>Mn<sub>6</sub>-300. Reaction conditions: [NO] = 10 ppm, balance = N<sub>2</sub>, temperature = 25 °C and GHSV = 120,000 mL·g<sup>-1</sup>·h<sup>-1</sup>.

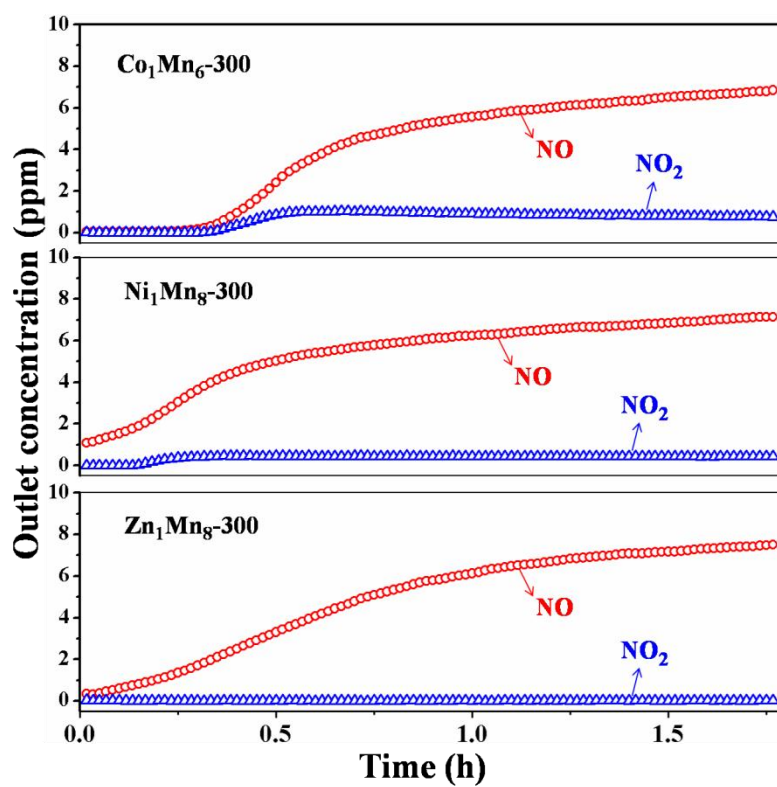



**Fig. S8.** TPD curves of  $\text{Co}_1\text{Mn}_6\text{-300}$ ,  $\text{Ni}_1\text{Mn}_8\text{-300}$  and  $\text{Zn}_1\text{Mn}_6\text{-300}$  after the first cycles of NO removal tests.

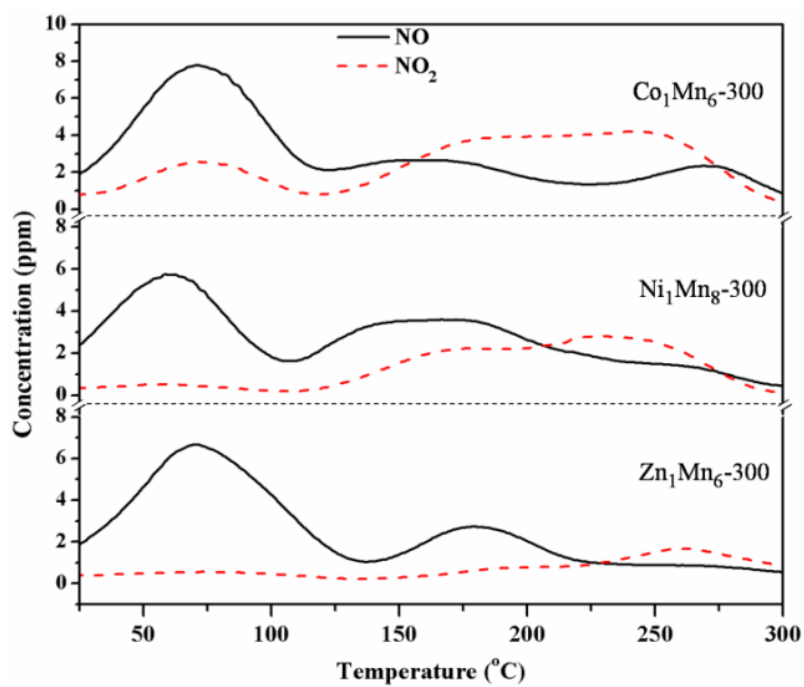

Supplement: c3ta10971b.pdf [file c3ta10971b.pdf]
